# Supplementary material
Source: MDPI journal article supplement (https://www.mdpi.com/2072-4292/14/19/4862)
Supplement: s1 [file s1]

# Evaluating the Effects of Climate Change and Human Activities on the Seasonal Trends and Spatial Heterogeneity of Soil Moisture

Ermei Zhang<sup>1,2</sup>, Yujie Liu<sup>1,2,\*</sup>, Tao Pan<sup>1,2</sup>, Qinghua Tan<sup>1,2</sup>, Zhiang Ma<sup>1</sup>  
<sup>1</sup> Key Laboratory of Land Surface Pattern and Simulation, Institute of Geographic Sciences and Natural Resources Research, Chinese Academy of Sciences, Beijing 100101, China  
<sup>2</sup> University of Chinese Academy of Sciences, Beijing 100049, China  
 \* Corresponding author at: No.11A, Datun Road, Chaoyang District, Beijing, China  
 E-mail address: liuyujie@igsnrr.ac.cn (Yujie Liu)

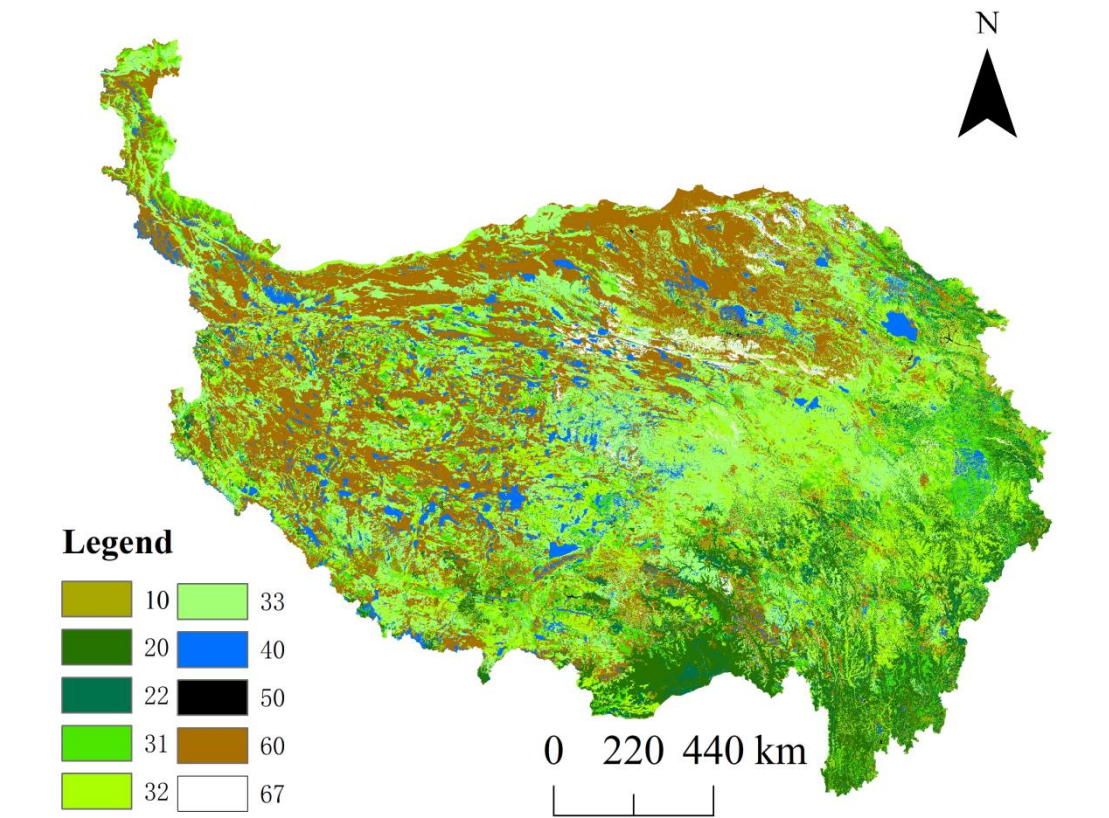

**Figure S1.** Land covers on the Tibetan Plateau in 2020. The legend numbers correspond to the land cover codes

**Table S1.** Lookup table of land cover classes in the Tibetan Plateau

| Code | Name     | Number in original data | Code | Name                   | Number in original data |
|------|----------|-------------------------|------|------------------------|-------------------------|
| 10   | Tillage  | 12                      | 33   | Low coverage grassland | 33                      |
|      | Dry land |                         |      | Low coverage grassland |                         |

|    |                           |                                                         |    |                          |                                                                                          |
|----|---------------------------|---------------------------------------------------------|----|--------------------------|------------------------------------------------------------------------------------------|
| 20 | Woodland                  | 21 Forested land, 23 Sparse woodland, 24 Other woodland | 40 | Water                    | 41 River channel, 42 Lake, 43 Reservoir pit, 44 Permanent glacier, 46 Shoal, 64 Wetlands |
| 22 | Shrub                     | 22 Shrubbery                                            | 50 | Construction land        | 51 Urban land, 52 Rural resident, 53 Other construction land, 61 Sandy land、62 Gobi,     |
| 31 | High coverage grassland   | 31 High coverage grassland                              | 60 | Sand, Gobi and Bare land | 63 Saline-alkali land, 65 Bare land, 66 Bare rock texture                                |
| 32 | Medium coverage grassland | 32 Medium coverage grassland                            | 67 | Desert                   | 67 Other unused land, including alpine desert, tundra, etc.                              |

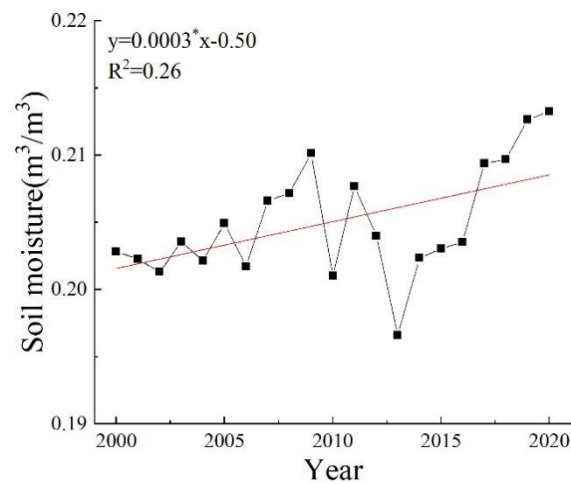

**Figure S2.** Annual variation of soil moisture from 2000 to 2020. \* was the significance of 0.05 level.

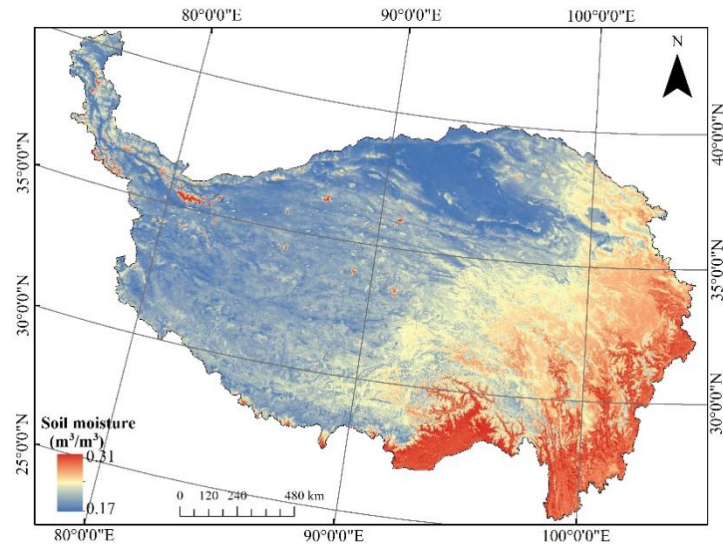

**Figure S3.** Spatial distribution of mean annual soil moisture of the Tibetan Plateau from 2000 to 2020.

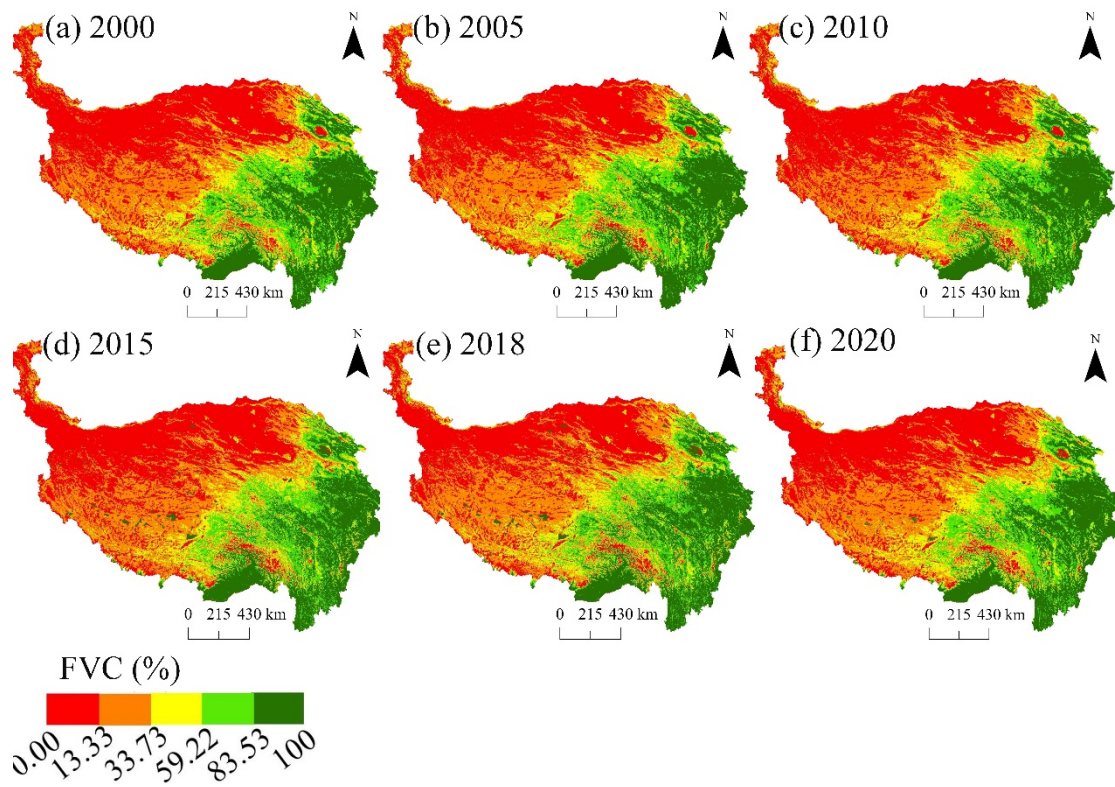

**Figure S4.** Spatial distribution of fractional vegetation coverage in the Tibetan Plateau from 2000 to 2020.
